# Supplementary material
Source: HighWire-hosted journal article supplement (https://fg.bmj.com/content/8/3/214)
Supplement: inline-supplementary-material-1 [file inline-supplementary-material-1.pdf]

Dear Sir / Madam,

We are currently working to improve the way this clinic provides you with information about your care. As part of this, our doctors have produced an information video that is available for patients to watch in clinic. To help us find out how effective the video is, we would be grateful if you could do the following:

1. **Complete this questionnaire**, so that we know what knowledge you currently have (10 minutes);
2. **Watch the video** on one of our clinic computers (10 minutes);
3. Complete a **second questionnaire**, so that we know what knowledge you have after watching the video (10 minutes).

All of your answers will be kept **strictly confidential** and will be used to evaluate the impact of the video.

If you would like any help to complete the questionnaire, or have any questions, please ask a member of the research team.

|                                                      |                   |
|------------------------------------------------------|-------------------|
| <b>SURNAME:</b>                                      | _____             |
| <b>FIRST NAME:</b>                                   | _____             |
| <b>DATE OF BIRTH:</b>                                | ___ / ___ / _____ |
| <b>HOW LONG HAVE YOU BEEN ATTENDING THIS CLINIC?</b> | _____             |

Please answer the following questions, placing a tick in the box next to your chosen answer (☑).

1. **Have you been ever told that you have liver cirrhosis or scarring of the liver?**

- a. Yes
- b. No

If you answered **NO** to this question, please do not proceed and **hand back the questionnaire** to the person in charge.

If you answered **YES**, please proceed to **question 2**.

**2.**

**(i) Have you had an ultrasound scan of your liver before?**

- a. Yes
- b. No

**(ii) Do you know why people with liver cirrhosis may require an ultrasound scan every 6 months?**

- a. Yes
- b. No

**(iii) If you answered NO to (ii), please proceed to question 3.  
If you answered YES to (ii), ultrasound scans are required to:  
(Choose the SINGLE BEST answer)**

- a. Check if the liver cirrhosis is getting worse
- b. Look for fluid (ascites) in the abdomen
- c. Look for the development of cancer
- d. Other (please state in box below)

**3.**

**(i) Have you had an endoscopy (camera test) before?**

- a. Yes
- b. No

**(ii) Do you know why people with liver cirrhosis may require an endoscopy?**

- a. Yes
- b. No

**(iii) If you answered NO to (ii), please proceed to question 4.**  
**If you answered YES to (ii), an endoscopy may be required to:**  
*(Choose the SINGLE BEST answer)*

- a. Look for any blockages along the path to the stomach
- b. Look for acid reflux (the cause of heartburn)
- c. Look for enlarged veins (varices) in the oesophagus
- d. Other (please state in box below)

**4.**

**(i) Have you had a bone-density scan before?**

- a. Yes
- b. No

**(ii) Do you know why people with liver cirrhosis may require a bone-density scan?**

- a. Yes
- b. No

**(iii) If you answered NO to (ii), please proceed to question 5.**  
**If you answered YES to (ii), a bone-density scan may be required to:**  
*(Choose the SINGLE BEST answer)*

- a. Check for weakening of bones
- b. Look for lumps in the bones
- c. Look for fractures
- d. Other (please state in box below)

5.

(i) Do you know why people with liver cirrhosis may have a higher than normal risk of internal bleeding?

- a. Yes
- b. No

(ii) If you answered NO to (i), please proceed to question 6.  
If you answered YES to (i), people with liver cirrhosis have a higher risk of internal bleeding because:  
(Choose the SINGLE BEST answer)

- a. They are liable to develop stomach ulcers
- b. They are liable to develop enlarged veins in the oesophagus
- c. Medications given for cirrhosis can weaken blood vessels
- d. Other (please state in box below)

6. People with liver cirrhosis may be at increased risk of which of the following complications? You may choose ONE or MORE THAN ONE answer.

- a. Weak muscles
- b. Problems with blood clotting
- c. Liver cancer
- d. None of the above
- e. Don't know

7.

(i) Do you know why people with liver cirrhosis may have episodes of confusion?

- a. Yes
- b. No

**(ii) If you answered NO to (i), please proceed to question 8.**  
**If you answered YES to (i), which of the following reasons explains why people with liver cirrhosis may experience confusion?**  
*(Choose the SINGLE BEST answer)*

- a. They are more liable to developing dementia
- b. The liver can't remove harmful substances from the blood which may affect the brain
- c. They are at greater risk of having mini-strokes
- d. Other (please state in box below)

**8.**

**(i) Are you currently taking regular laxatives (e.g. lactulose)?**

- a. Yes
- b. No

**(ii) Do you know why people with liver cirrhosis may need to take laxatives even though they might not be constipated?**

- a. Yes
- b. No

**(iii) If you answered NO to (ii), please proceed to question 9.**  
**If you answered YES to (ii), laxatives may be required to:**  
*(Choose the SINGLE BEST answer)*

- a. Remove toxins from the bowel
- b. Speed-up the breakdown of food
- c. Improve the absorption of food
- d. Other (please state in box below)

**9. Please list as many functions of the liver as you can (up to 3) in the space below, or LEAVE BLANK if you don't know.**

(i)

(ii)

(iii)

Thank you for completing this questionnaire. Please return it to a member of the research team who will then show you the information video.

Thank you very much for your time; it is greatly appreciated.
